# Supplementary material
Source: Research Square preprint supplement (doi:10.21203/rs.3.rs-9363048/v1)
Supplement: Supplementary file 1 [file c4309f665e88051e55a99ded.doc]

**Supplementary Information for**

**Dual-modal optical coherence tomography endoscopy for true volumetric intravascular imaging**

Dejun Liu1,2,†, Ziyi Huang1,2,†, Chenyang Su1,2, Yalong Tai1,2, Shuai Xiao1,2, Lei Xu3, Dezhi Zhu1,2, Ying Wang1,2, Rui Zhu3, Jianan Li3,4, Lei Song5, Junle Qu1, Liwei Liu1, Cailing Fu1,2,*, Yiping Wang1,2,* and Changrui Liao1,2,*

**Affiliations**

1State Key Laboratory of Radio Frequency Heterogeneous Integration, Key Laboratory of Optoelectronic Devices and Systems of Ministry of Education/Guangdong Province, College of Physics and Optoelectronic Engineering, Shenzhen University, Shenzhen 518060, China

2Shenzhen Key Laboratory of Ultrafast Laser Micro/Nano Manufacturing, Guangdong and Hong Kong Joint Research Centre for Optical Fibre Sensors, Shenzhen University, Shenzhen 518060, China

3School of Electronic and Communication Engineering, Shenzhen Polytechnic University, Shenzhen 518055, China

4Shenzhen Vivolight Medical Device & Technology Co., Ltd., Shenzhen 518055, China

5Xi'an Institute of Optics and Precision Mechanics (XIOPM), Chinese Academy of Sciences, Xian 710119, China

6Department of Cardiology, Fuwai Hospital, National Centre for Cardiovascular Diseases, National Clinical Research Centre for Cardiovascular Diseases, Chinese Academy of Medical Sciences and Peking Union Medical College, Beijing 100037, China

*Correspondence: Lei Xu ([csleixu@szpu.edu.cn](mailto:csleixu@szpu.edu.cn)); Cailing Fu ([f](mailto:f)[ucailing@szu.edu.cn](mailto:fucailing@szu.edu.cn)); Yiping Wang ([ypwang@szu.edu.cn](mailto:ypwang@szu.edu.cn)); Changrui Liao ([cliao@szu.edu.cn](mailto:cliao@szu.edu.cn))

**1. Imaging characterization of the 3D printed on-fiber OCT probe**


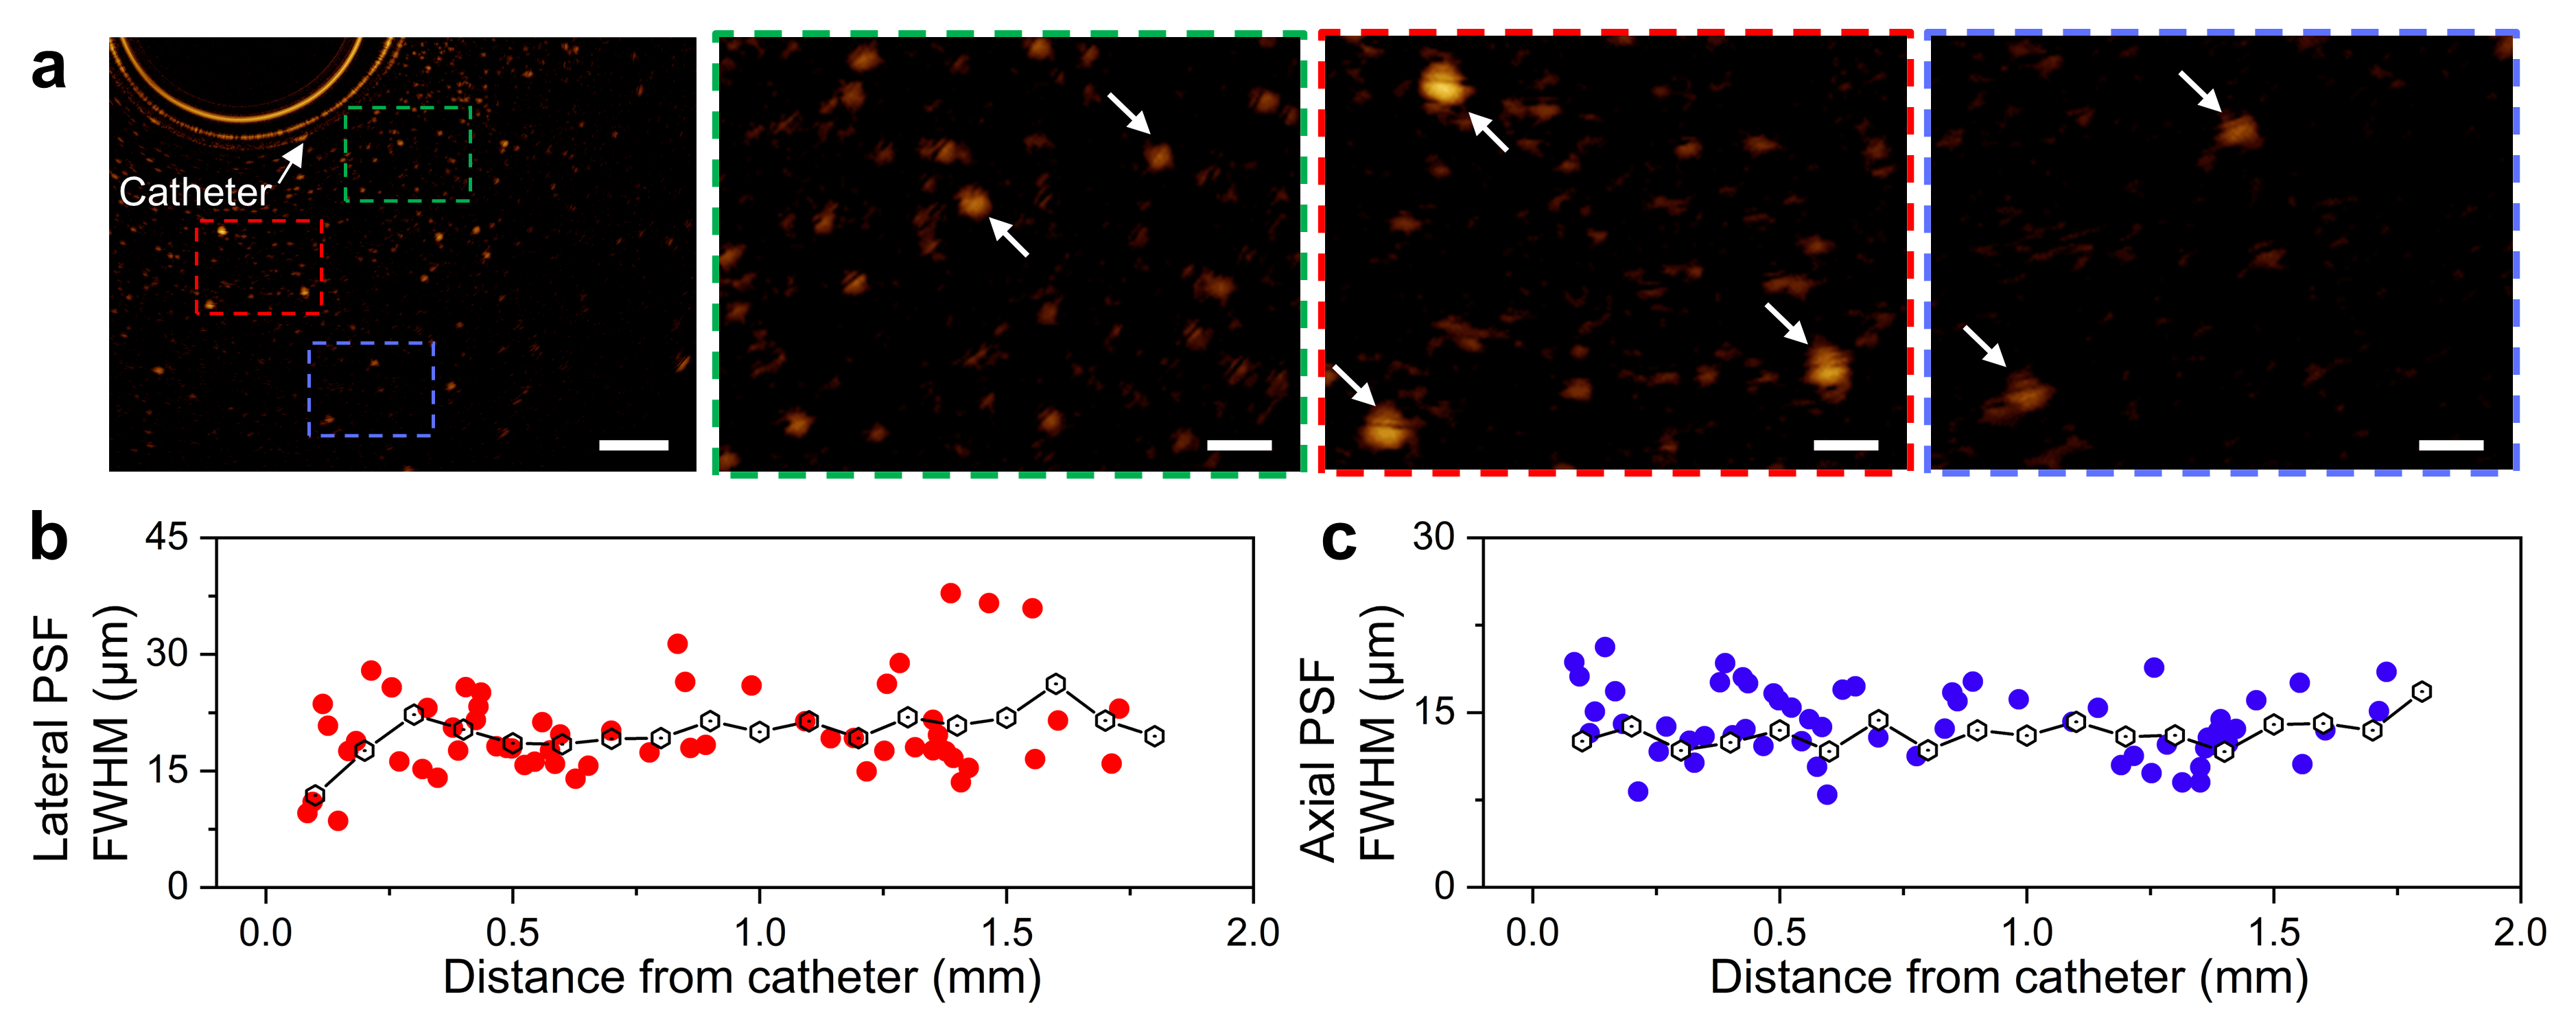


Supplementary Figure 1. OCT imaging PSF characterization. a Cross-sectional image of a nanoparticle phantom with 3 magnified images. The nanoparticles are composed of iron oxide with an average size of 30 nm. Scale bars in the main image and the three magnified images are 500 μm and 100 μm. b FWHM of the lateral PSF as a function of imaging depth. c FWHM of the axial PSF as a function of imaging depth. The black dot-circle lines are the measured FWHM of the lateral and axial PSF averaged every 100 μm. The average FWHM of the lateral and axial PSF throughout the image are 15 μm and 14 μm, with a DOF of 700 μm, demonstrating that a long DOF beam is generated by the proposed microlens.


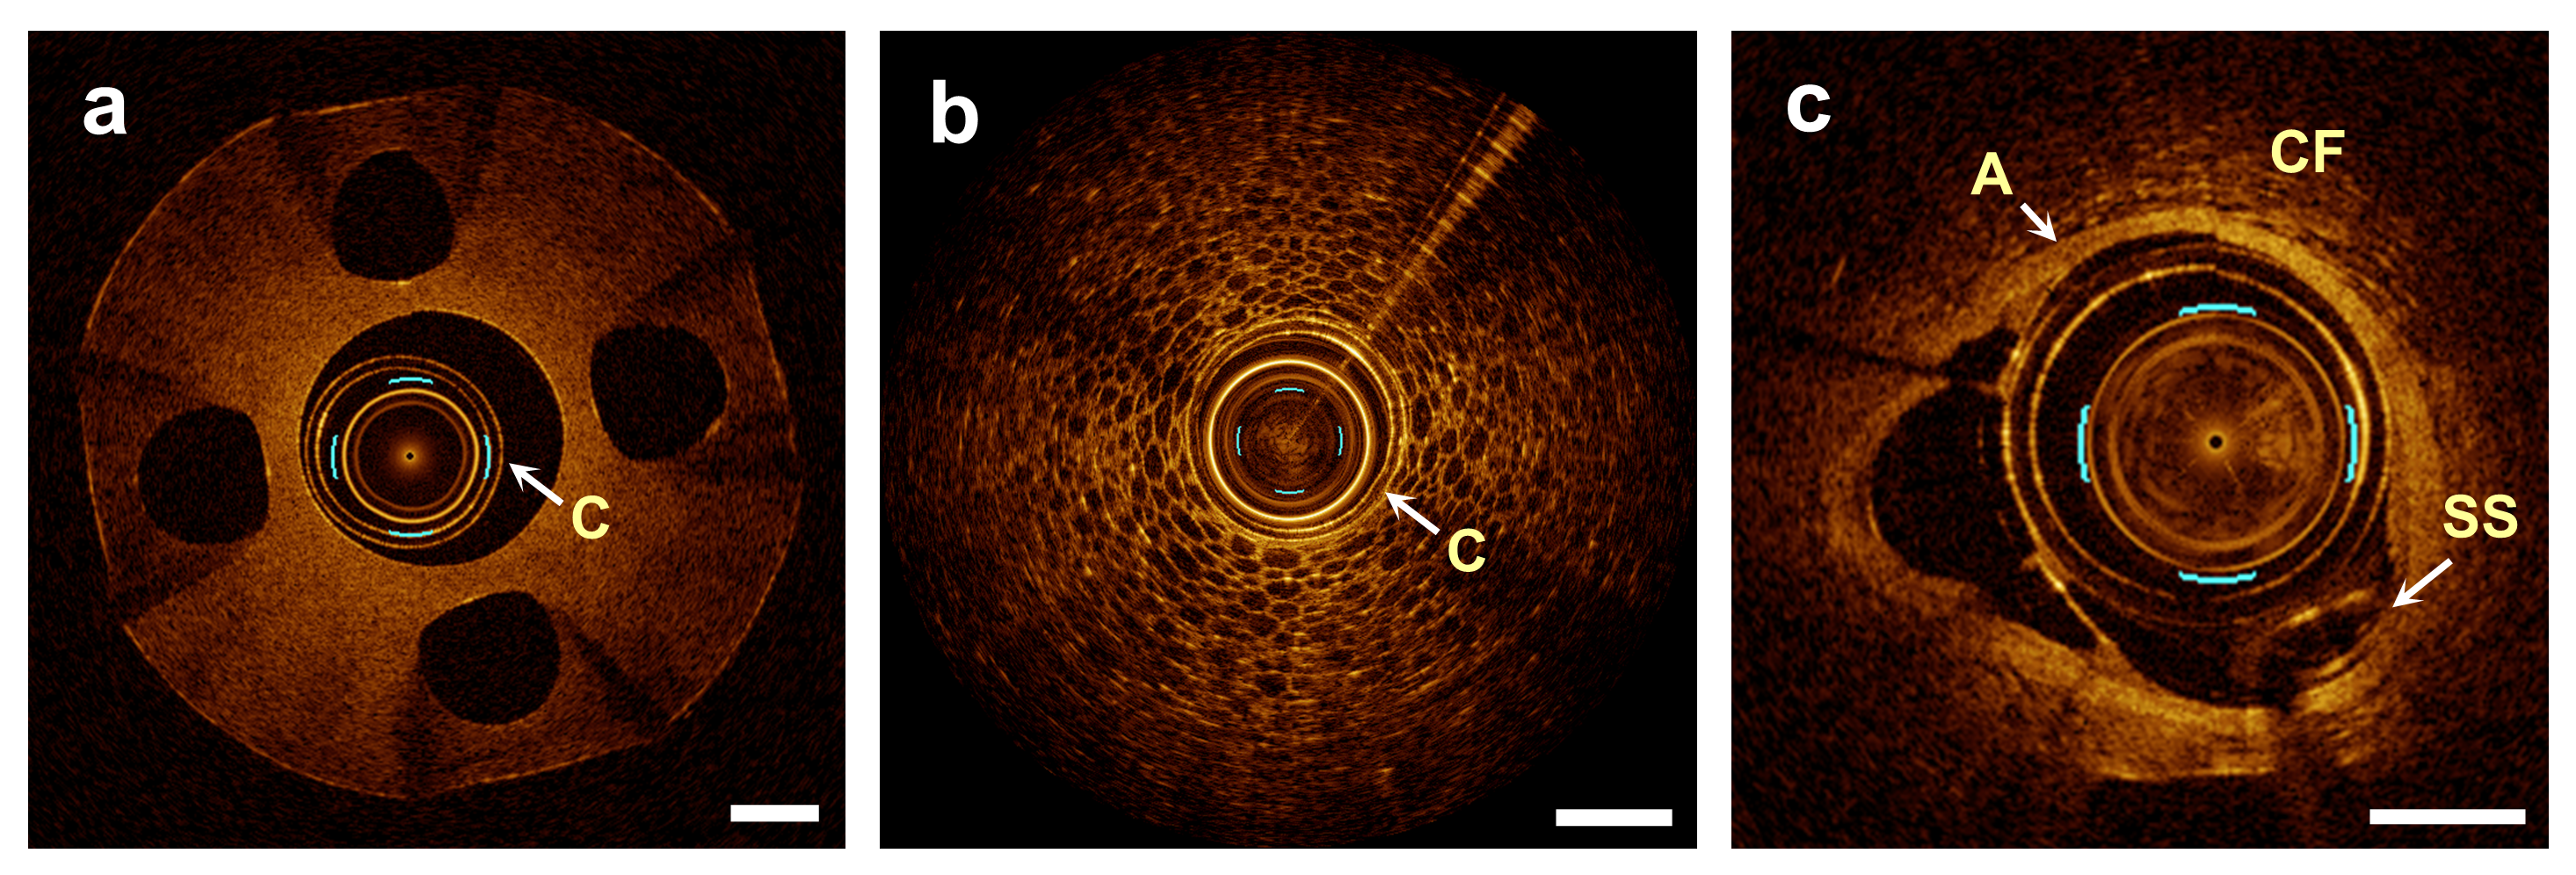


Supplementary Figure 2. Cross-section OCT images of different objects. a Five-chamber tube. The irregular inner profile of the four outer holes can be clearly distinguished. b Grapes. The unique grid-like pattern of the grape cell wall can be distinctly resolved. c Porcine coronary artery. The boundary of the adventitia of vascular wall and the surrounding collagen fiber can be clearly seen. The coronary artery was imaged when the OCT probe was integrated with a fiber shape sensor, demonstrating that the dual-modal catheter can pass through bio-tissue easily. C: Cather. A: Adventitia. CF: Collagen fiber. SS: Shape sensor. Scale bars are 500 μm.

**2. Characterization of the seven-core fiber shape sensor**


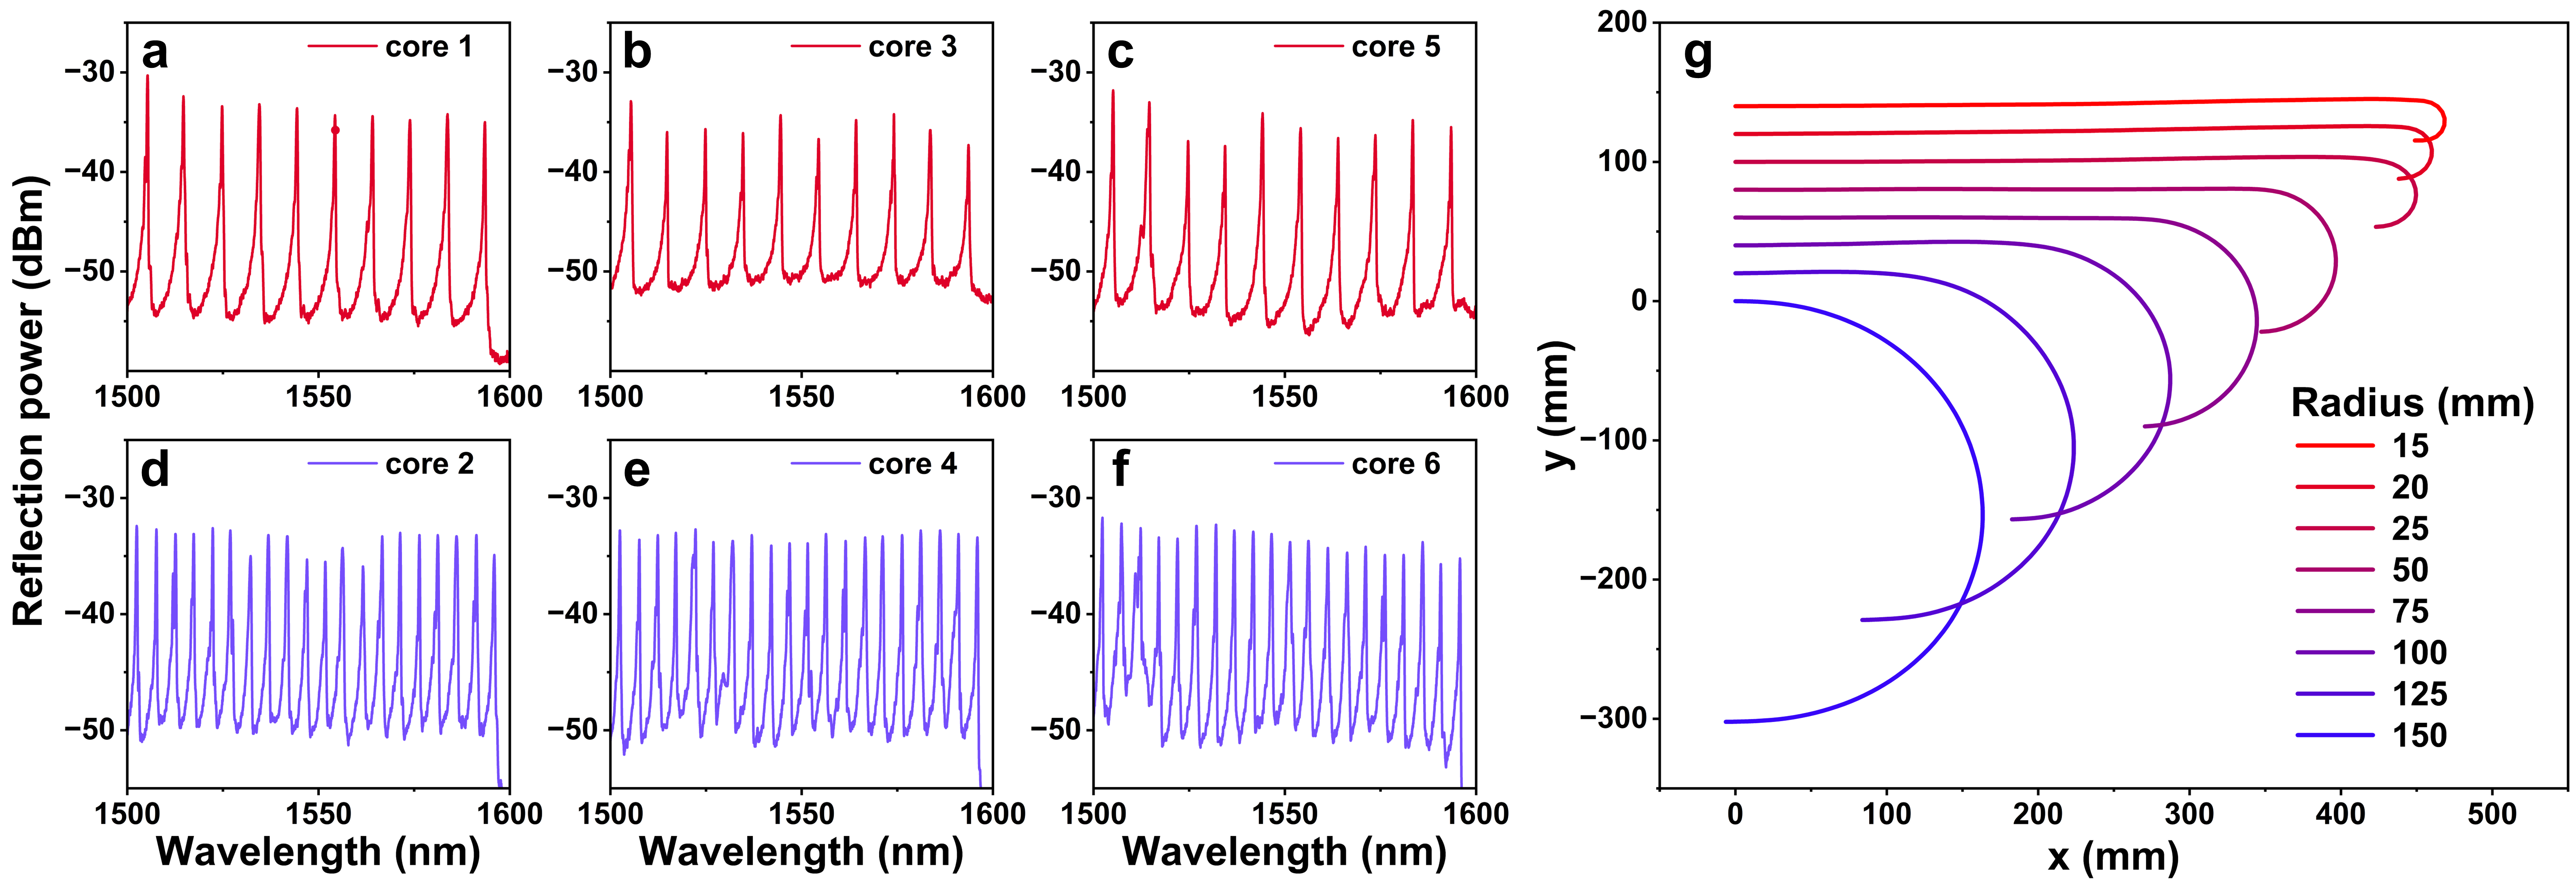


Supplementary Figure 3. Characterization of seven-core fiber Shape sensor. a-f Reflective spectrum of the grating arrays in core 1 to 6. The difference between the maximum and minimum reflection intensities among gratings in six fiber cores are -4.5, -3.3, -4.4, -1.4, -5.6 and -4 dB, with high reflectivity and uniformity that ensured reliable sensing performance. g Reconstructed shape of the fiber sensor embedded in a two-groove plate with different radius from 150 mm to 15 mm. The relative error of radius measured by the reconstructed shape from 150 mm to 15 mm were calculated to be 0.3%, 1.4%, 2.1%, 1.1%, 2.4%, 2.0%, 1.5% and 0.9%, indicating that the measured shape is highly consistent with the ground-truth shape.

**3. Generation of 3D volumetric image of vascular phantom with linear model and vector curve model**


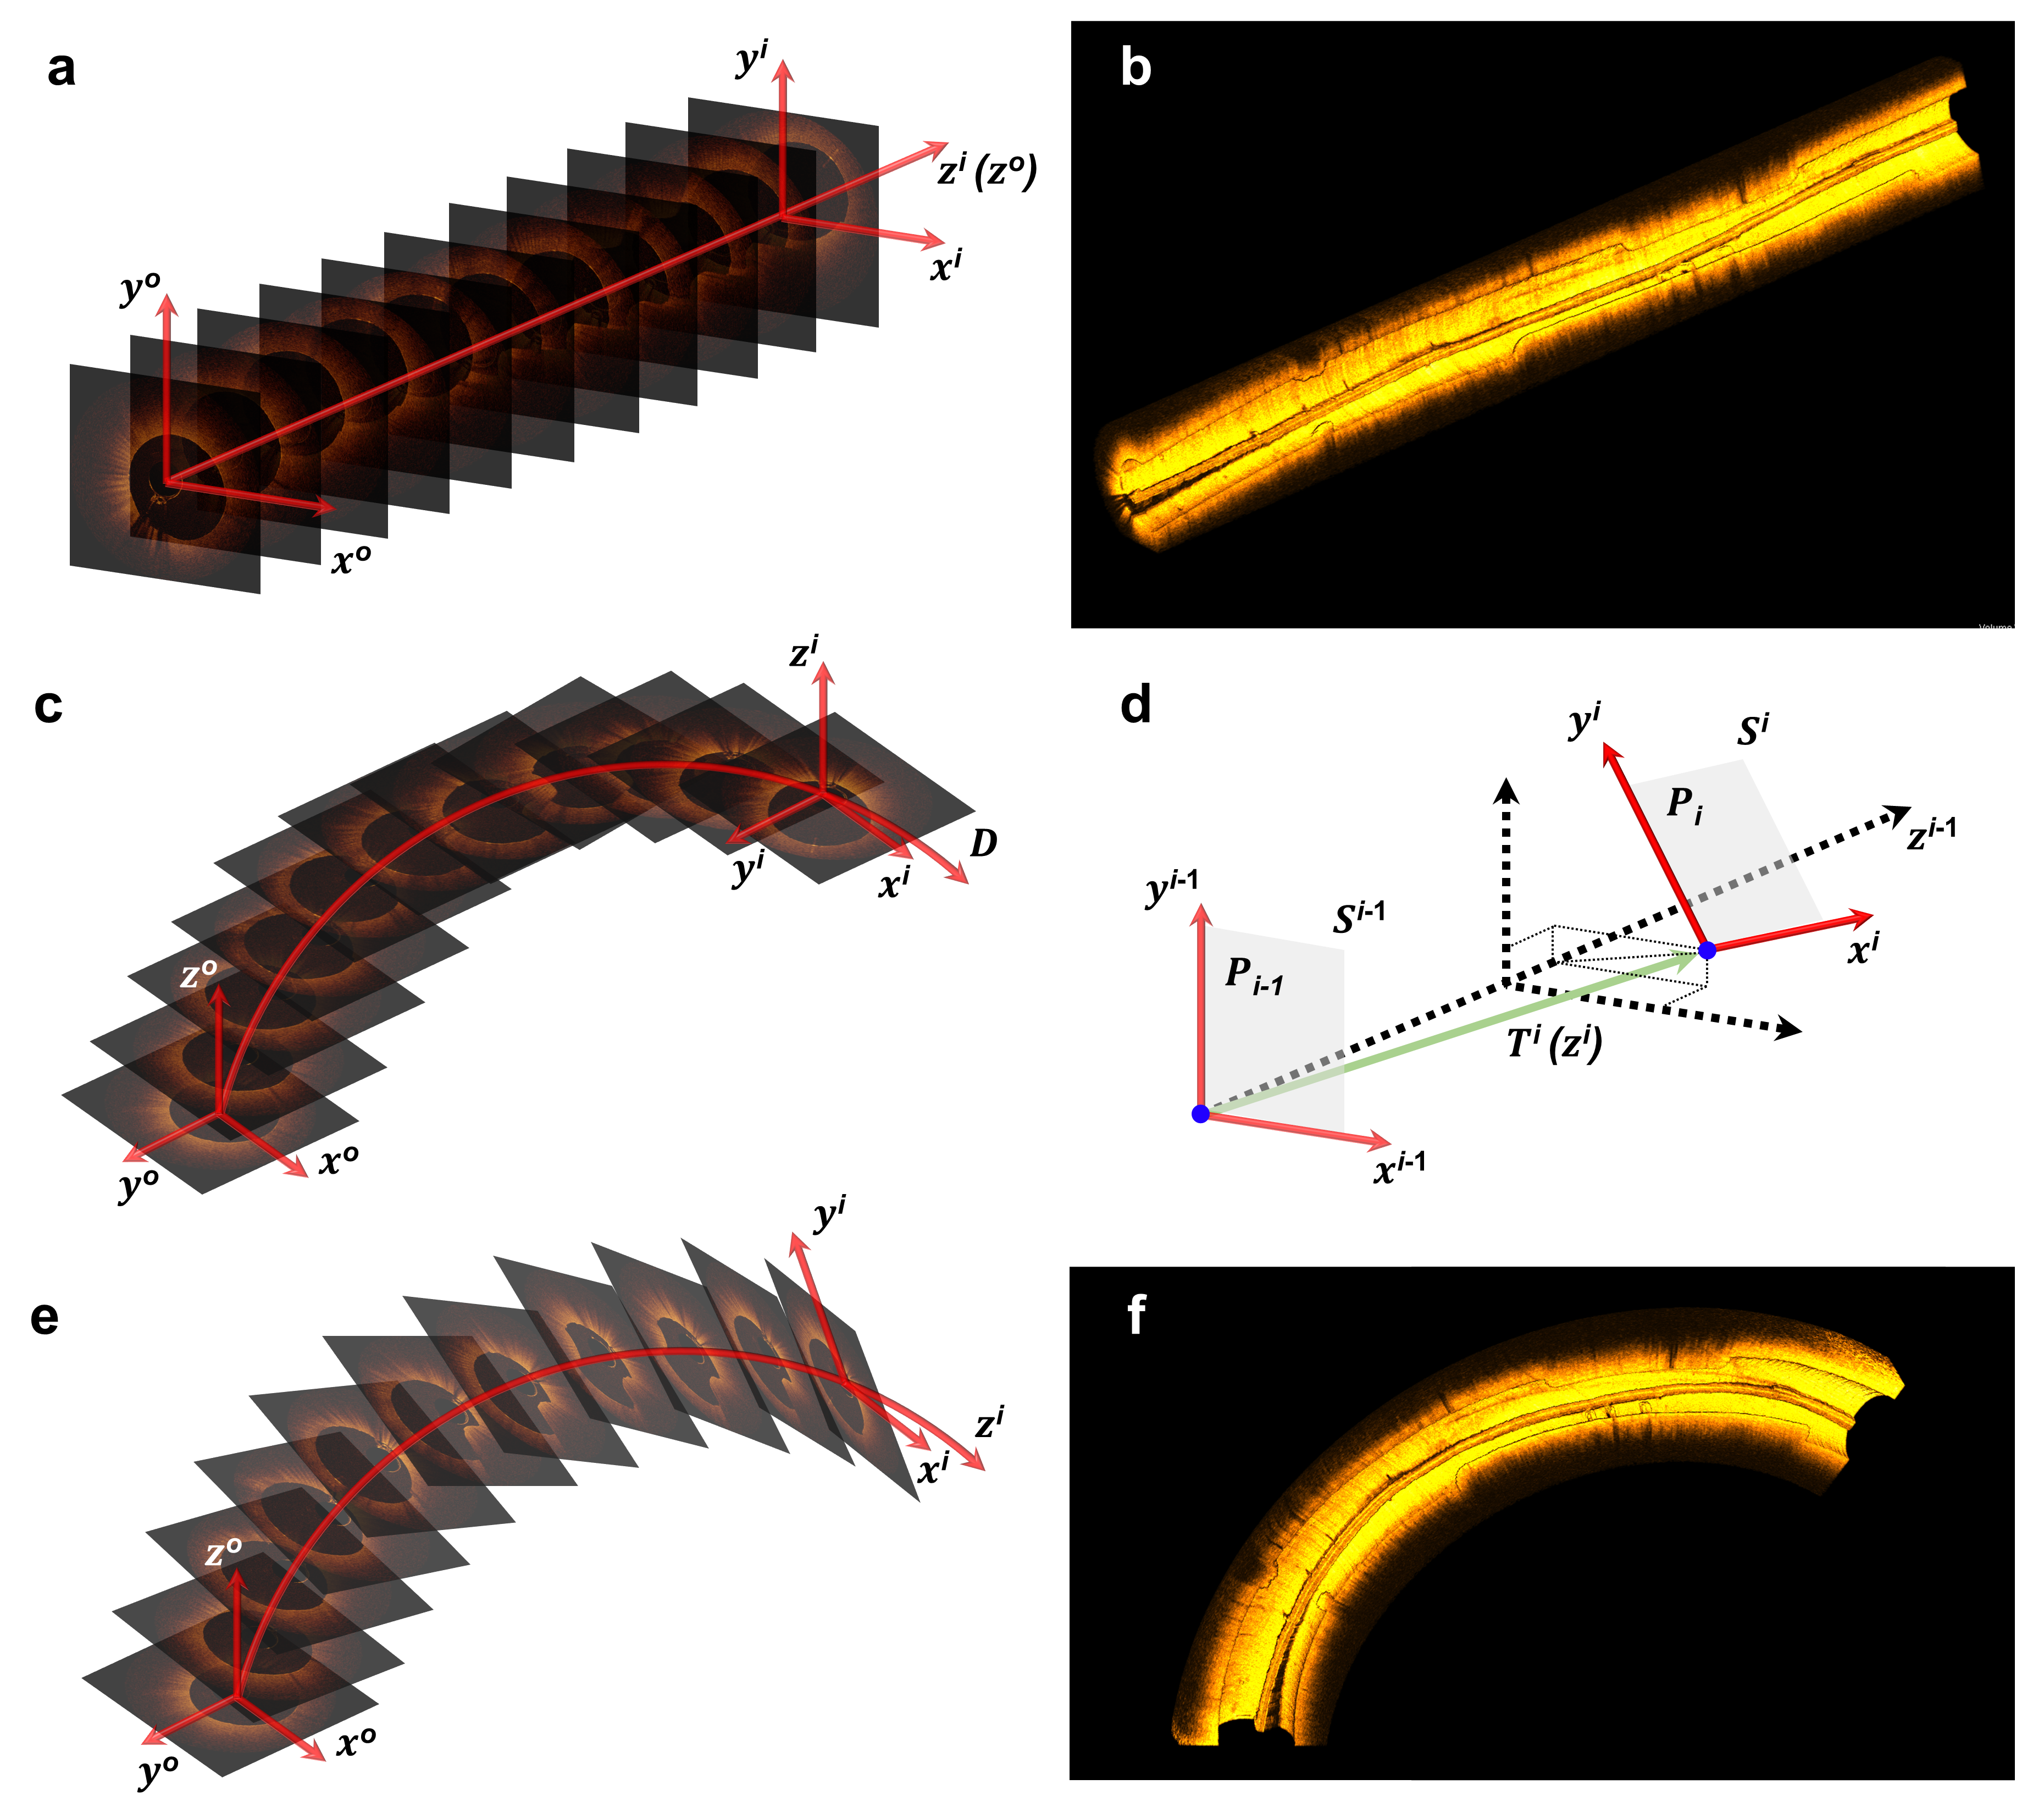


Supplementary Figure 4. Schematic diagram of generating 3D volumetric image of vascular phantom with linear model and vector curve model. a Stacking 2D images with a linear model. b Cut-away view of vascular phantom with linear model. c Spatial coordinates matching between the center points of 2D OCT images and the corresponding sampling points of the spline curve of the shape sensor. *D* is the direction of the spline curve. d Schematic diagram of the transformation between the *i*-th and (*i*-1)-th coordinate system. e 2D OCT images rotation based on the translation vector between two adjacent points. f Cut-away view of vascular phantom with vector curve model.

4. Ex vivo imaging of a rabbit iliac artery with implanted stent


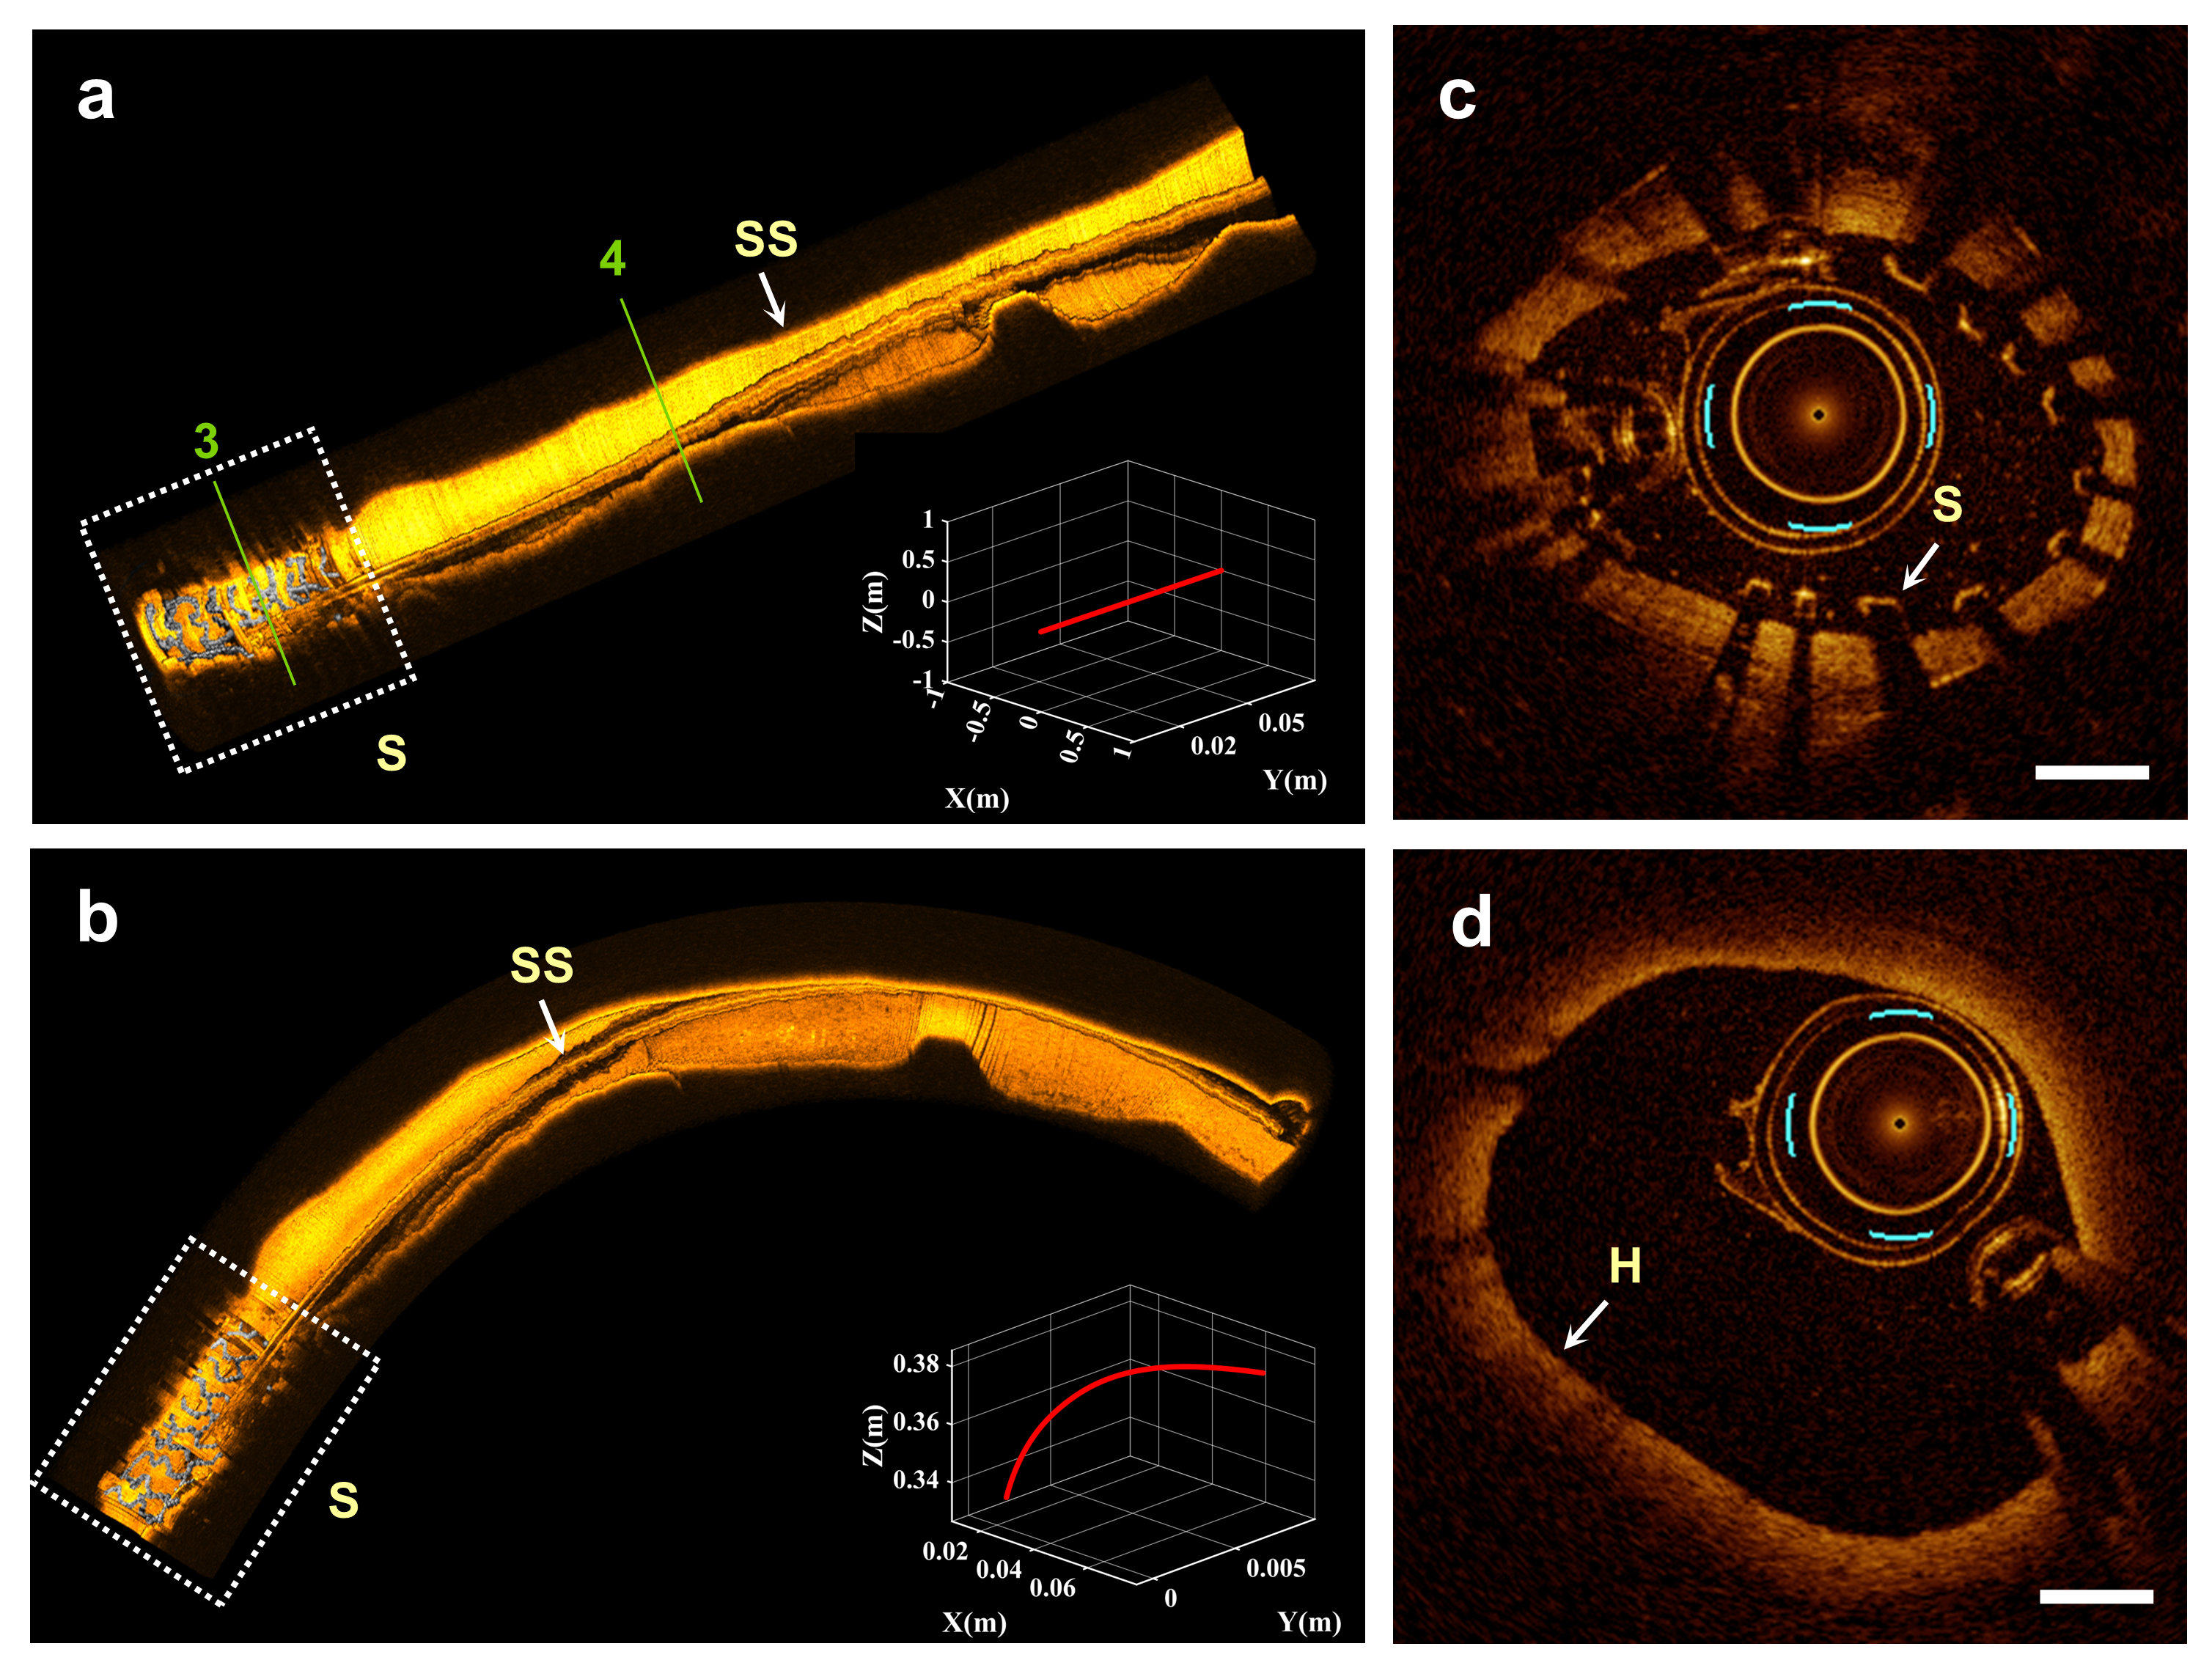


Supplementary Figure 5. Ex vivo imaging of a rabbit iliac artery with implanted stent. a Linear stacking of OCT cross-section images of expired vascular sample. b Vector stacking of OCT cross-section images of expired vascular sample. c OCT cross-section images at location 3 in a. d OCT cross-section images at location 4 in a. During OCT imaging, the vascular sample implanted with vascular stents was pre-bended in a curved slot with a radius of 75 mm in a two-groove plate. The implanted vascular stent is marked with a white dashed rectangular frame. SS: shape sensor. C: catheter. It is demonstrated that the proposed dual-mode catheter shows good performance in shape reconstruction of a largely curved vessel and it can easily distinguish between healthy blood vessel wall and the stent, clear stent malposition can also be identified. A: artifact. S: stent. H: health vessel wall. Scale bar in c and d are 500 μm.

5. The U-shaped vascular phantom


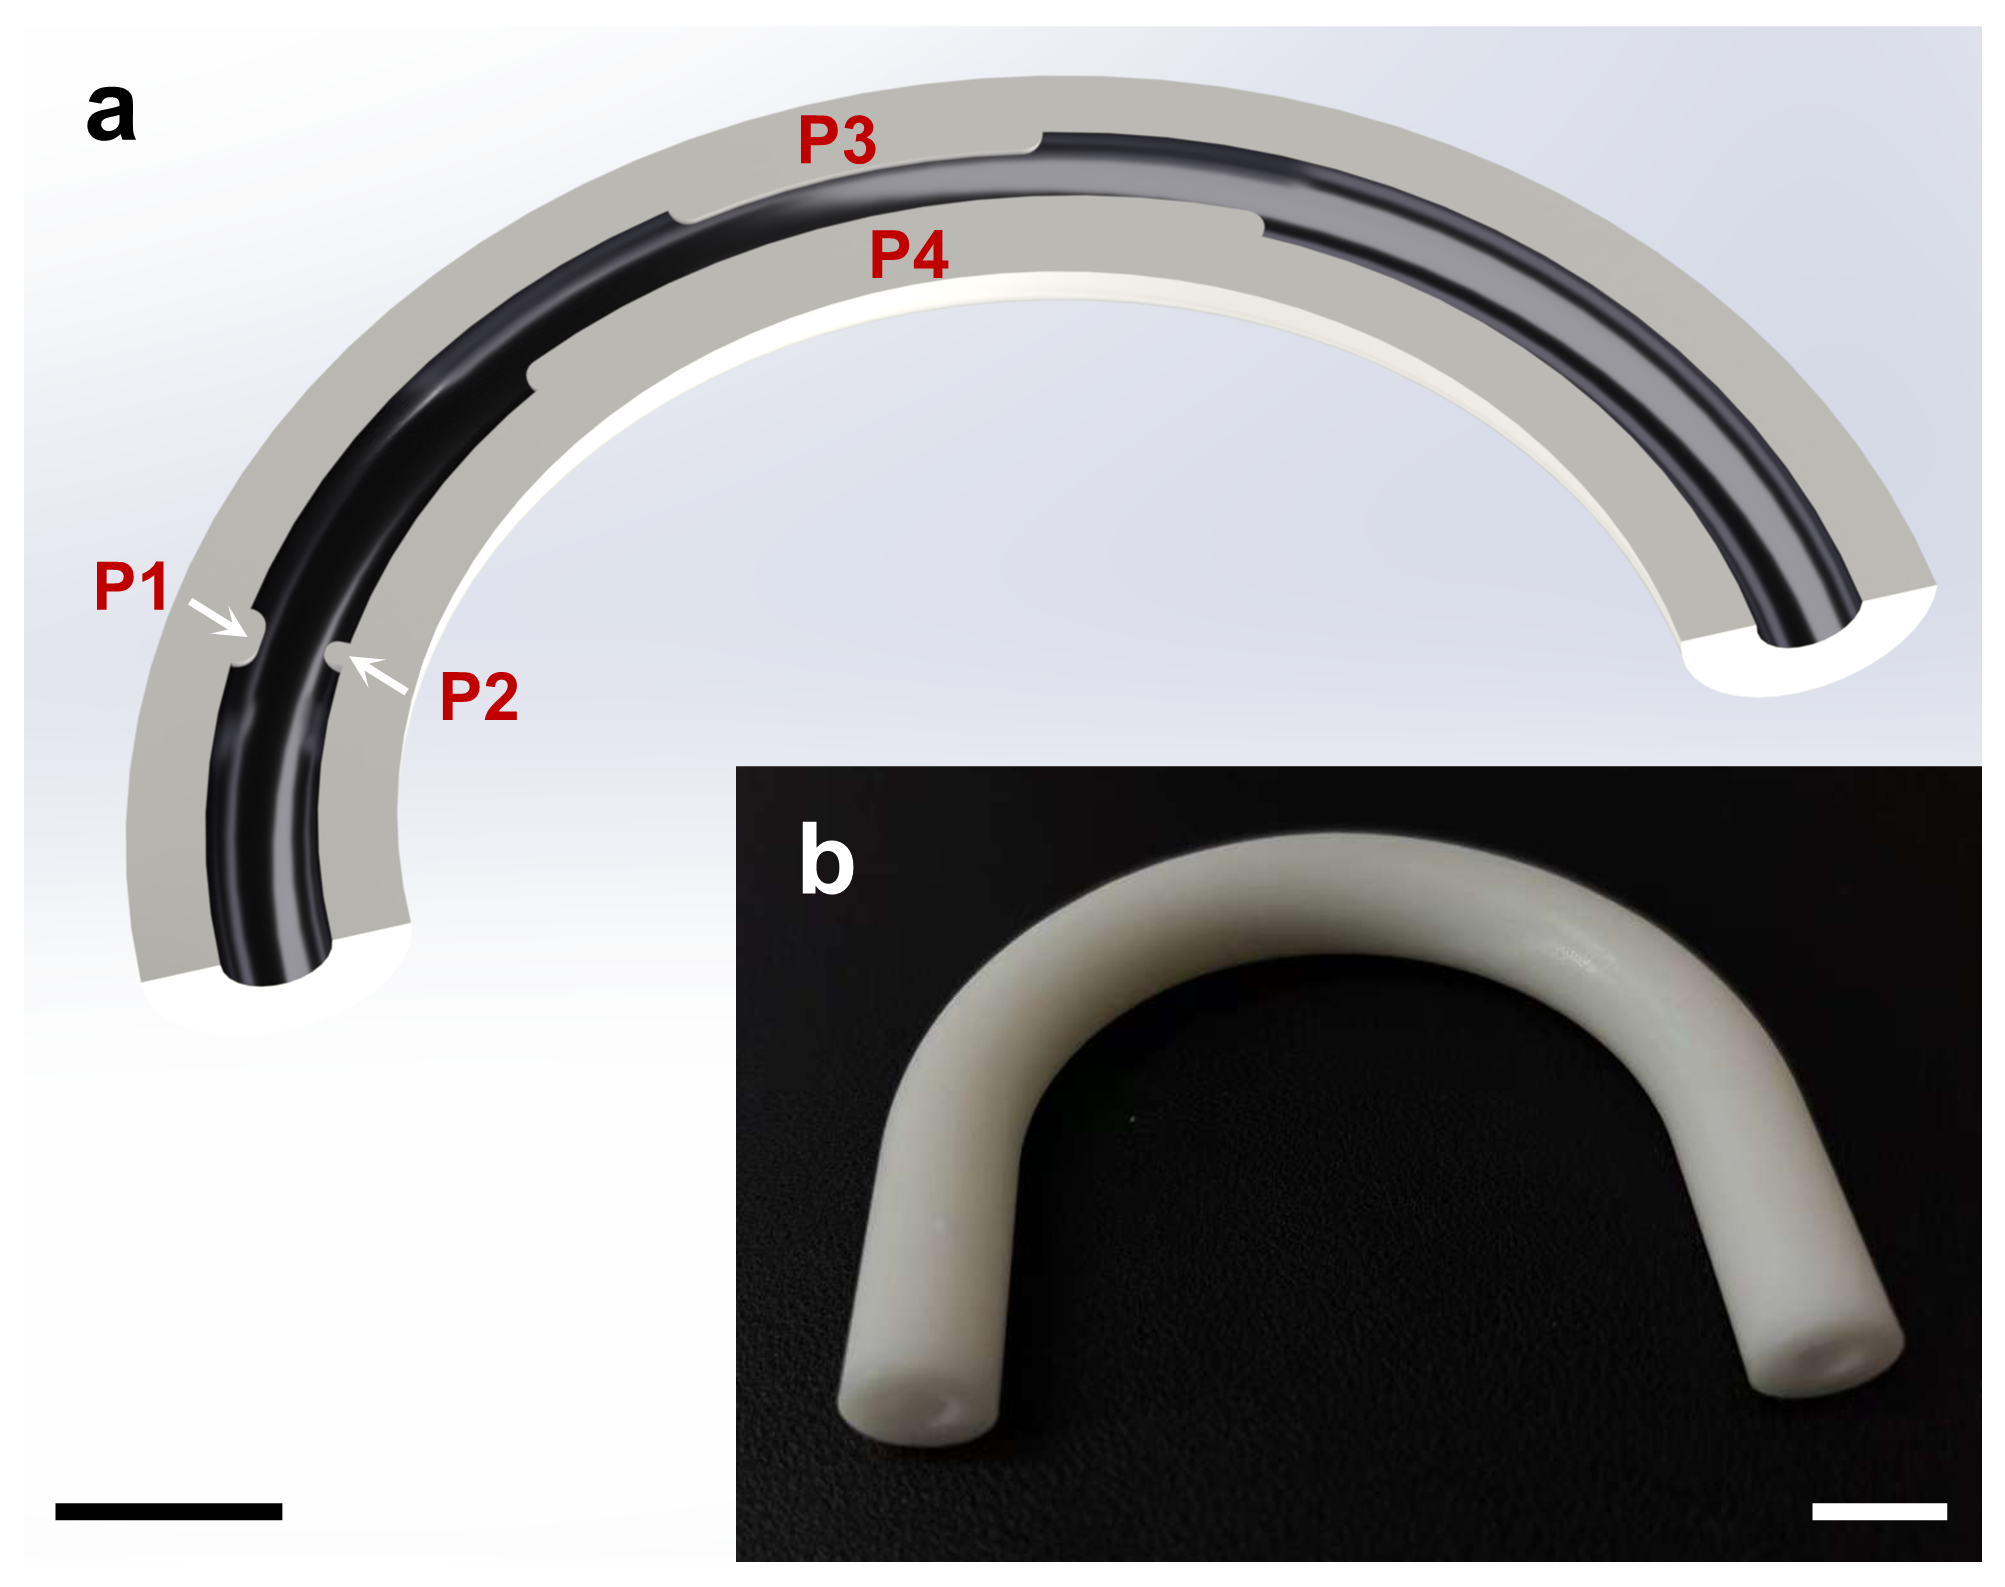


Supplementary Figure 6. The U-shaped vascular phantom. a Schematic diagram of cut-away view of the designed phantom. The outer diameter and inner diameter of this phantom are 12 mm and 5 mm, respectively. Two semicircular plaques (marker “P1” and “P2”) and two strip-shaped plaques (marker “P3” and “P4”) with different length are attached on the inner wall of the vascular phantom and the radius of the vascular phantom is 35 mm. b The customized vascular phantom was fabricated via stereolithography. Scale bars in a and b are 1 cm.

6. Generation of the OCT volumetric fused images of the Y-shaped vascular phantom


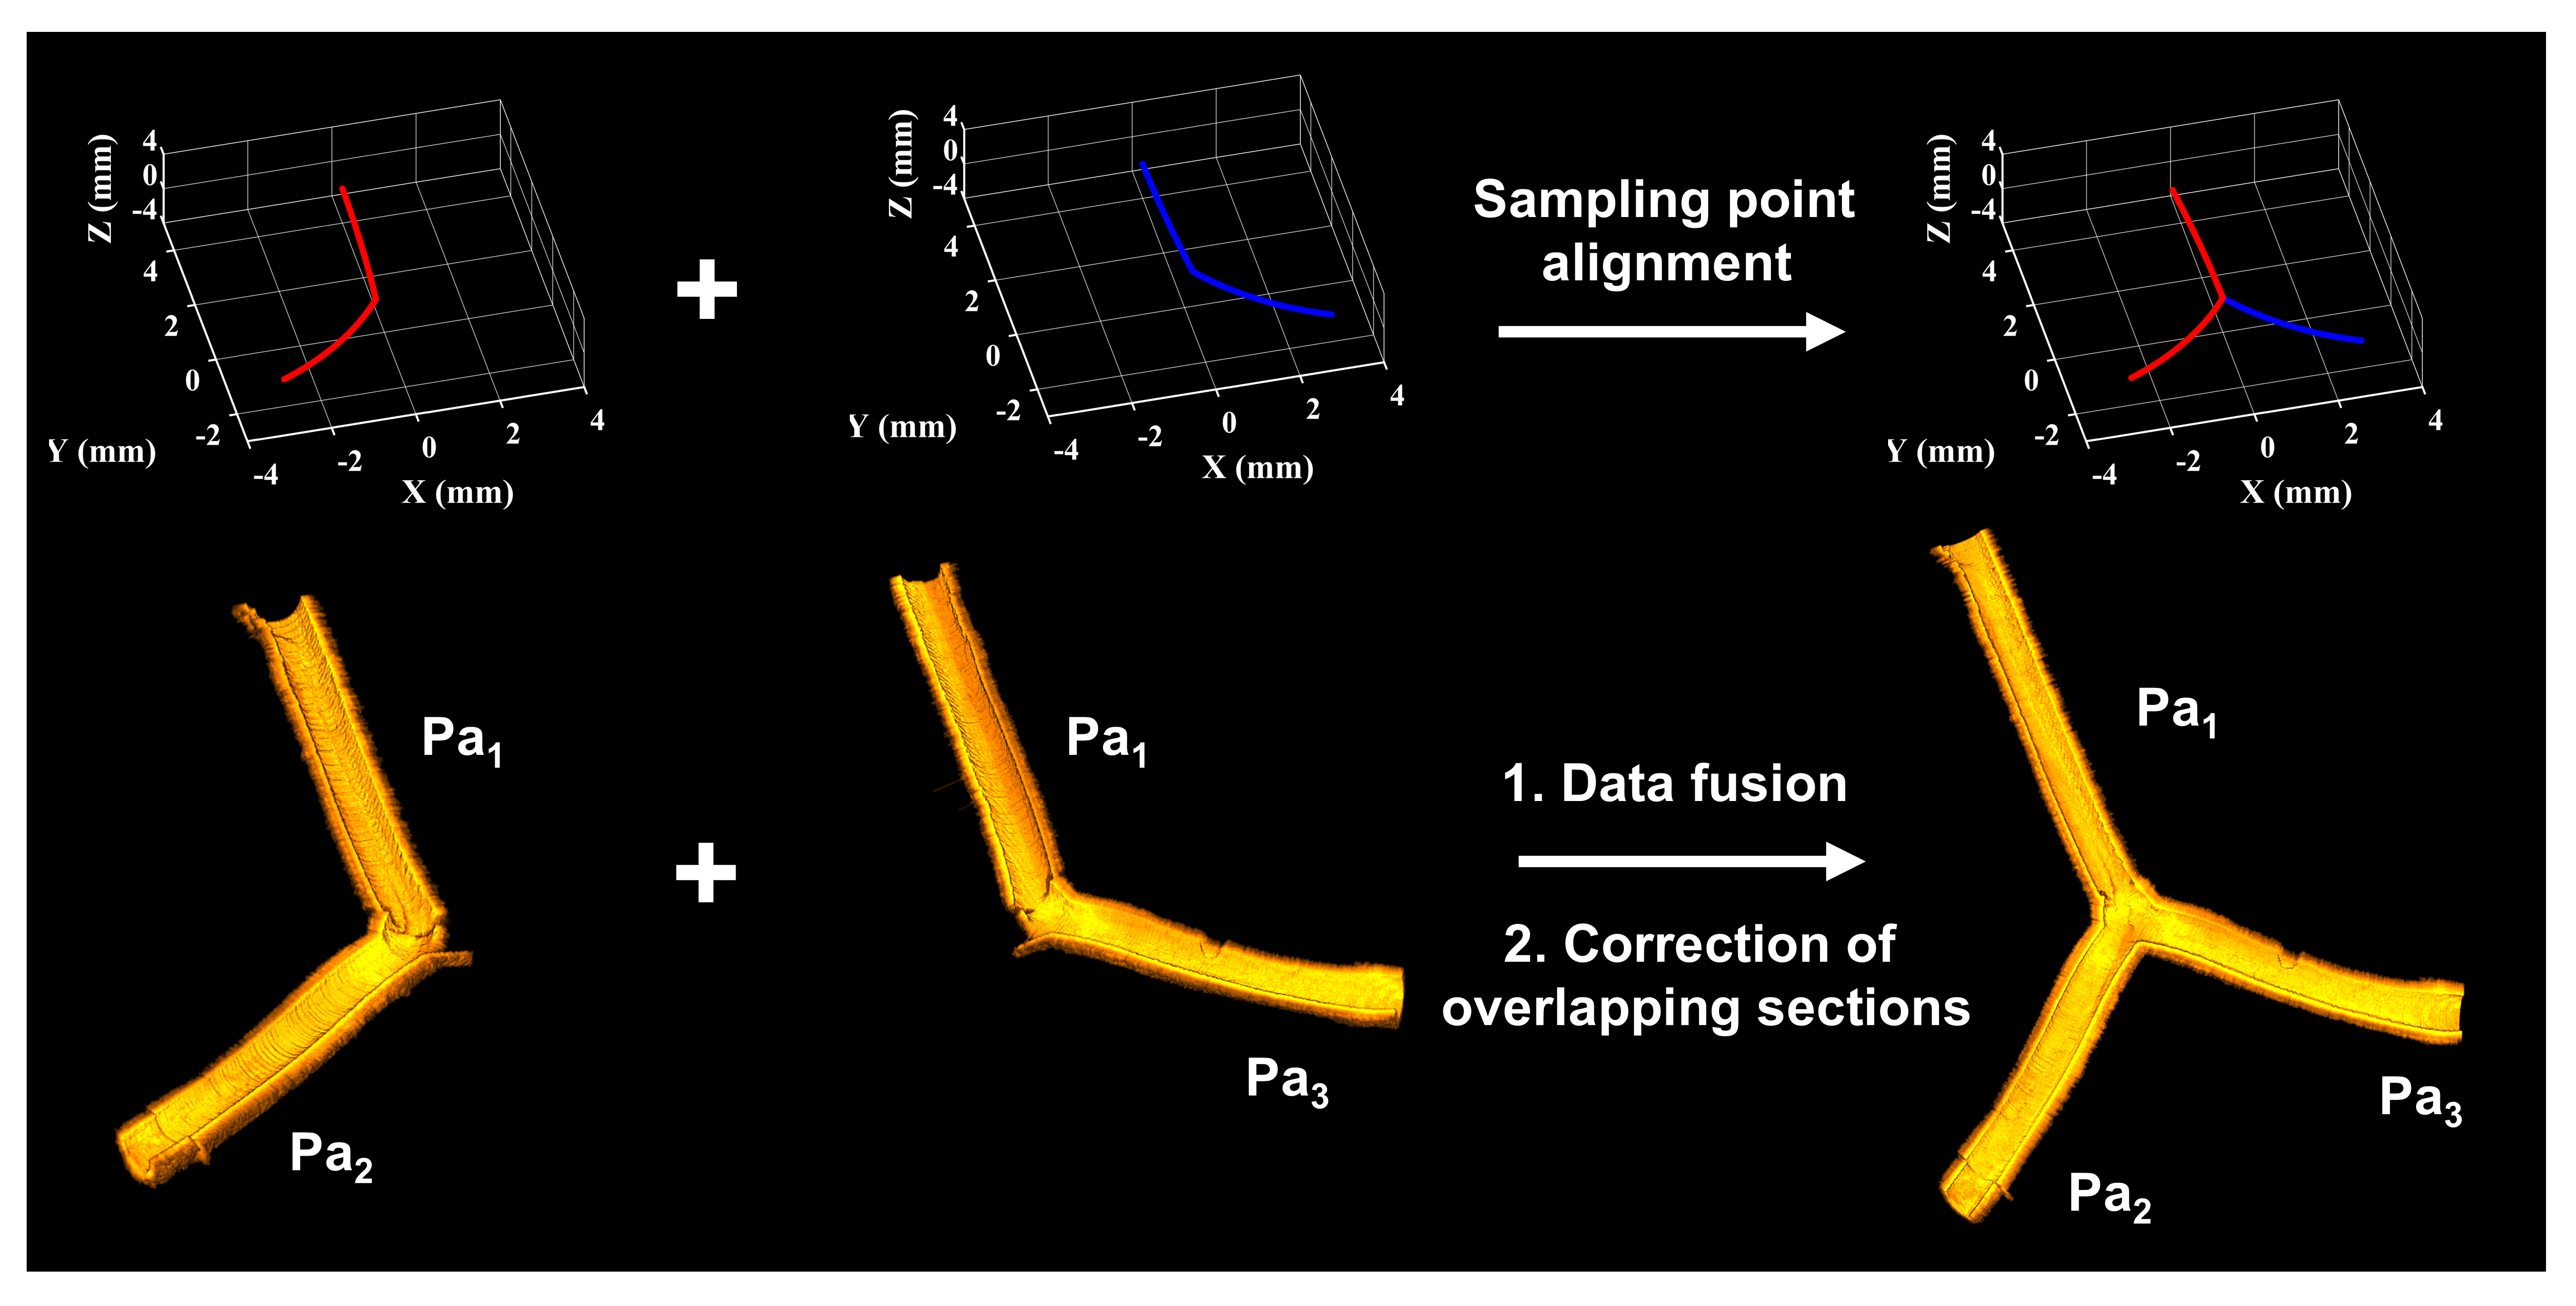


Supplementary Figure 7. Generation of the OCT volumetric fused images of the Y-shaped vascular phantom. Two OCT cross-sectional image datasets and the corresponding spatial information are collected by successively imaging the two branches Pa2 and Pa3. The top three panels illustrate the 3D shapes of the individual branch Pa2, Pa3 and the fused Y-shaped geometry path after sampling point alignment of the overlapping section Pa1. The bottom three panels present 3D volumetric image of the left branch Pa2 and right branch Pa3, along with the complete Y-shaped phantom generated through data fusion and subsequent pixel correction of the overlapping areas.

**7. Method for generating 3D OCT images with linear model and vector curve model**

A cross-sectional OCT 2D image is composed of a number of pixel points, hence a 2D image can be expressed as a pixel coordinate points set (PCPS) :

where and represent the number of pixel points in the horizontal and vertical directions of the 2D images, is the image index, , and are 3D coordinates in free space, where is initially 0. As depicted in Supplementary Fig. 4a, these 2D images are then stacked in parallel along a linear model, forming a 3D PCPS , where each image PCPS can be expressed as:

where stands for the step interval between two adjacent images. Supplementary Fig. 4b shows the cut-away image of the vascular phantom generated using the linear model method.

When stacking the 2D images with a vector curve model based on the spatial location of the fiber shape sensor, the center pixel point of a 2D image is first translated to the coordinates of the corresponding sampling point of the spline curve of the fiber shape sensor, as shown in Supplementary Fig. 4c. Therefore, a set of translation vectors could be calculated form adjacent points of the sampling points. Then, the translated PCPS () of can be expressed as:

The next step is to utilize the translation vector as the normal vector for rotating 2D images () to generate the final 3D PCPS , as demonstrated in Fig. 4e. This process can be considered as finding the coordinates of in a new coordinate system , which can be obtained through translation and rotation of in the original coordinate system . In , is directed in , as shown in Fig. 4d. Hence, based on the method of constructing an orthogonal coordinate system, the *i*-th coordinate system can be described by the following equation:

where ,and are three unit vectors in , which also serve as the rotation matrix from the (*i-1*)-th to *i*-th coordinate systems. Therefore, the final 3D PCPS () after image translation and rotation can be expressed by the following equation:

As a result, a vascular phantom that more closely resembles the actual shape can be reconstructed using the vector curve stacked OCT images. Supplementary Fig. 4f shows its cut-away image of 3D rendering.
